# Supplementary material for: The effect of particle size and composition on the optical and electronic properties of CdO and CdS rocksalt nanoparticles
Source: Royal Society of Chemistry journal article supplement (doi:10.1039/d2cp01342h), 2022-01-01
Supplement: d2cp01342h1.pdf [file d2cp01342h1.pdf]

## Supporting information for:

### The Effect of Particle Size and Composition on the Optical and Electronic Properties of CdO and CdS Rocksalt Nanoparticles

Martijn A. Zwijnenburg

Department of Chemistry, University College London, 20 Gordon Street,  
London WC1H 0AJ, U.K.

Email: [m.zwijnenburg@ucl.ac.uk](mailto:m.zwijnenburg@ucl.ac.uk)

**Table S1** -IP, -EA, fundamental gap ( $\Delta_F$ ), optical gap ( $\Delta_o$ ) and exciton binding energy (EBE) predicted for the CdS nanoparticles using evGW-BSE starting from B3LYP orbitals and the different basis-sets and method combinations. In the case of the optical gap both the optical gap based on the lowest excited and the lowest bright excited state (in bold) are given. Similarly, exciton binding energies calculated for the lowest and the lowest bright excited state are presented.

| Particle             | Basis-set  |       | -IP    | -EA    | $\Delta_F$ | $\Delta_o$        | EBE       |
|----------------------|------------|-------|--------|--------|------------|-------------------|-----------|
| (CdS) <sub>4</sub>   | def2-SVP   | AC    | -7.941 | -1.588 | 6.35       | 2.42/ <b>2.46</b> | 3.94/3.89 |
| (CdS) <sub>4</sub>   | def2-SVP   | AC/2c | -7.978 | -1.694 | 6.28       |                   |           |
| (CdS) <sub>4</sub>   | def2-SVP   | SR    | -8.352 | -1.845 | 6.51       | 2.56/2.63         | 3.95/3.88 |
| (CdS) <sub>4</sub>   | def2-TZVPP | AC    | -8.366 | -1.876 | 6.49       | 2.55/ <b>2.61</b> | 3.94/3.88 |
| (CdS) <sub>4</sub>   | def2-TZVPP | SR    | -8.352 | -1.845 | 6.51       | 2.56/ <b>2.63</b> | 3.95/3.88 |
| (CdS) <sub>32</sub>  | def2-SV(P) | AC    | -6.751 | -2.295 | 4.46       | 2.10/ <b>2.29</b> | 2.36/2.16 |
| (CdS) <sub>32</sub>  | def2-SVP   | AC    | -6.751 | -2.468 | 4.28       | 1.93/ <b>2.13</b> | 2.35/2.15 |
| (CdS) <sub>32</sub>  | def2-TZVPP | AC    | -7.170 | -2.837 | 4.33       | 2.00/ <b>2.18</b> | 2.33/2.16 |
| (CdS) <sub>32</sub>  | Def2-TZVPP | CD    | -7.170 | -2.836 | 4.33       | 2.02/ <b>2.19</b> | 2.31/2.14 |
| (CdS) <sub>108</sub> | def2-SV(P) | AC    | -6.331 | -2.572 | 3.76       | 1.97              | 1.79      |

**Table S2** -IP, -EA, fundamental gap ( $\Delta_F$ ), optical gap ( $\Delta_o$ ) and exciton binding energy (EBE) predicted for the CdO nanoparticles using using evGW-BSE starting from B3LYP orbitals and the different basis-sets and method combinations. In the case of the optical gap both the optical gap based on the lowest excited and the lowest bright excited state (in bold) are given. Similarly, exciton binding energies calculated for the lowest and the lowest bright excited state are presented.

| Particle             | Basis-set  |       | -IP    | -EA    | $\Delta_F$ | $\Delta_o$        | EBE       |
|----------------------|------------|-------|--------|--------|------------|-------------------|-----------|
| (CdO) <sub>4</sub>   | def2-SVP   | AC    | -7.430 | -1.586 | 5.84       | <b>1.46</b>       | 4.38      |
| (CdO) <sub>4</sub>   | def2-SVP   | AC/2c | -7.547 | -1.677 | 5.87       |                   |           |
| (CdO) <sub>4</sub>   | def2-SVP   | SR    | -8.049 | -1.871 | 6.18       | <b>1.80</b>       | 4.38      |
| (CdO) <sub>4</sub>   | def2-TZVPP | AC    | -8.054 | -1.900 | 6.15       | <b>1.77</b>       | 4.38      |
| (CdO) <sub>4</sub>   | def2-TZVPP | SR    | -8.049 | -1.871 | 6.18       | <b>1.80</b>       | 4.38      |
| (CdO) <sub>32</sub>  | def2-SV(P) | AC    | -6.548 | -1.833 | 4.72       | 2.08/ <b>2.17</b> | 2.64/2.55 |
| (CdO) <sub>32</sub>  | def2-SVP   | AC    | -6.560 | -2.013 | 4.55       | 1.92/ <b>2.01</b> | 2.62/2.54 |
| (CdO) <sub>32</sub>  | def2-TZVPP | AC    | -7.079 | -2.497 | 4.60       | 2.01/ <b>2.07</b> | 2.59/2.53 |
| (CdO) <sub>32</sub>  | def2-TZVPP | CD    | -7.108 | -2.482 | 4.63       | 2.08/ <b>2.11</b> | 2.55/2.52 |
| (CdO) <sub>108</sub> | def2-SV(P) | AC    | -6.178 | -2.110 | 4.07       | 1.96              | 2.10      |

**Table S3** optical gap ( $\Delta_o$ ) predicted for the CdO and CdS nanoparticles using LR-CCSD/def2-TZVPP for geometries optimised using B3LYP/def2-TZVPP.

| Particle           | $\Delta_o$ |
|--------------------|------------|
| (CdO) <sub>4</sub> | 2.02       |
| (CdS) <sub>4</sub> | 2.85       |

**Table S4** -IP, -EA, fundamental gap ( $\Delta_F$ ), optical gap ( $\Delta_o$ ) and exciton binding energy (EBE) predicted for the CdO and CdS nanoparticles using  $G_0W_0$ -BSE/def2-SVP starting from B3LYP orbitals. In the case of the optical gap both the optical gap based on the lowest excited and the lowest bright excited state (in bold) are given. Similarly, exciton binding energies calculated for the lowest state are presented.

| Particle             | Basis-set  |    | -IP    | -EA    | $\Delta_F$ | $\Delta_o$ | EBE  |
|----------------------|------------|----|--------|--------|------------|------------|------|
| (CdO) <sub>32</sub>  | def2-TZVPP | AC | -6.637 | -2.118 | 3.95       |            |      |
| (CdO) <sub>32</sub>  | def2-SVP   | AC | -6.184 | -6.184 | 3.92       | 1.33       | 2.59 |
| (CdO) <sub>32</sub>  | def2-SV(P) | AC | -6.148 | -2.118 | 4.03       | 1.42       | 2.52 |
| (CdO) <sub>108</sub> | def2-SV(P) | AC | -5.877 | -2.370 | 3.51       | 1.44       | 2.01 |
| (CdS) <sub>32</sub>  | def2-TZVPP | AC | -6.908 | -3.035 | 3.87       |            |      |
| (CdS) <sub>32</sub>  | def2-SVP   | AC | -6.542 | -2.724 | 3.82       | 1.49       | 2.33 |
| (CdS) <sub>32</sub>  | def2-SV(P) | AC | -6.532 | -2.587 | 3.95       | 1.60       | 2.34 |
| (CdS) <sub>108</sub> | def2-SV(P) | AC | -6.172 | -2.855 | 3.32       | 1.55       | 1.77 |

**Table S5** -IP, -EA, fundamental gap ( $\Delta_F$ ), optical gap ( $\Delta_o$ ) and exciton binding energy (EBE) predicted for the CdO and CdS nanoparticles with methylamine capping agents using evGW-BSE/def2-SVP starting from B3LYP orbitals.

| Particle            | NH <sub>2</sub> (CH <sub>3</sub> ) |    | -IP    | -EA    | $\Delta_F$ | $\Delta_o$ | EBE  |
|---------------------|------------------------------------|----|--------|--------|------------|------------|------|
| (CdO) <sub>32</sub> | 4                                  | AC | -5.757 | -0.905 | 4.85       | 2.292      | 2.56 |
| (CdO) <sub>32</sub> | 16                                 | AC | -5.140 | 0.116  | 5.26       | 2.834      | 2.42 |
| (CdO) <sub>32</sub> | 28                                 | AC | -4.764 | 0.594  | 5.36       | 2.989      | 2.37 |
| (CdS) <sub>32</sub> | 4                                  | AC | -6.410 | -1.377 | 5.03       | 2.770      | 2.26 |
| (CdS) <sub>32</sub> | 16                                 | AC | -5.154 | 0.039  | 5.19       | 3.192      | 2.00 |
| (CdS) <sub>32</sub> | 28                                 | AC | -4.523 | 0.780  | 5.30       | 3.247      | 2.06 |

**Table S6** -IP, -EA, fundamental gap ( $\Delta_F$ ), optical gap ( $\Delta_o$ ) and exciton binding energy (EBE) predicted for a CdO nanoparticle using  $G_0W_0$ -BSE starting from HSE03 orbitals for a geometry optimised with B3LYP/def2-TZVPP.

| Particle            | Basis-set  |    | -IP    | -EA    | $\Delta_F$ | $\Delta_o$ | EBE  |
|---------------------|------------|----|--------|--------|------------|------------|------|
| (CdO) <sub>32</sub> | def2-TZVPP | AC | -6.571 | -2.611 | 3.96       | 1.436      | 2.52 |

**Table S7** NBO charges for atoms in the centre and on the corner of (MgO)<sub>32</sub>, (CdO)<sub>32</sub> and (CdS)<sub>32</sub> as calculated with B3LYP/def2-TZVPP.

| Particle            | Centre       |            | Corner       |            |
|---------------------|--------------|------------|--------------|------------|
|                     | Charge Mg/Cd | Charge O/S | Charge Mg/Cd | Charge O/S |
| (MgO) <sub>32</sub> | 1.78         | -1.82      | 1.80         | -1.77      |
| (CdO) <sub>32</sub> | 1.65         | -1.77      | 1.61         | -1.48      |
| (CdS) <sub>32</sub> | 1.46         | -1.62      | 1.43         | -1.22      |

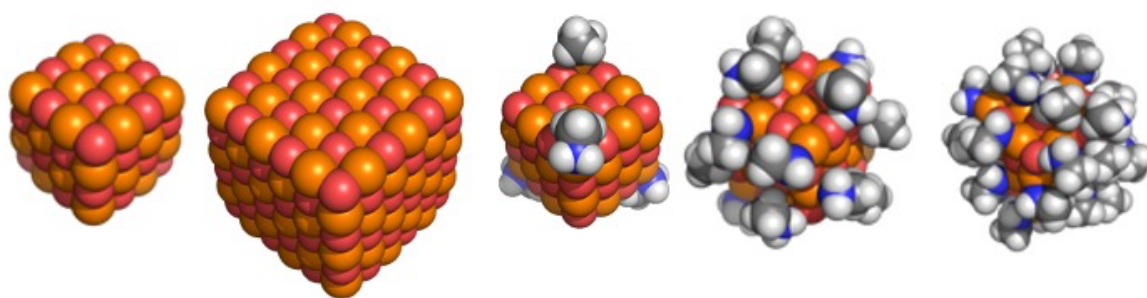

**Fig. S1** DFT optimised structures of the  $(\text{CdO})_{32}$ ,  $(\text{CdO})_{108}$  and the  $(\text{CdO})_{32}(\text{NH}_2(\text{CH}_3))_4$ ,  $(\text{CdO})_{32}(\text{NH}_2(\text{CH}_3))_{16}$  and  $(\text{CdO})_{32}(\text{NH}_2(\text{CH}_3))_{28}$  particles.

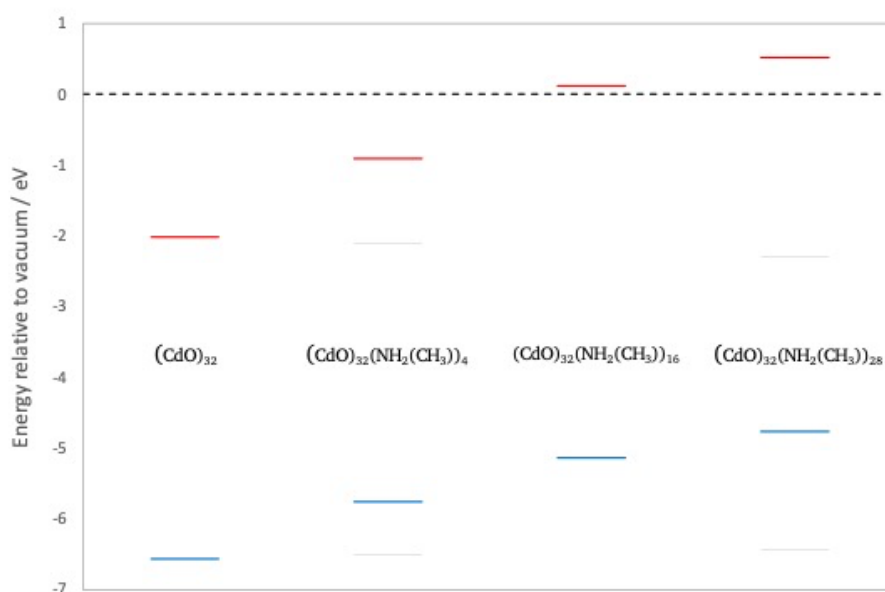

**Fig. S2** Change in the predicted optical spectra of  $(\text{CdS})_{32}$  with number of capping agents on the surface as calculated with  $ev\text{GW}(AC)\text{-BSE}/def2\text{-SV}(P)$ . Red lines -EA, blue lines -IP, grey lines -IP and -EA of particles.

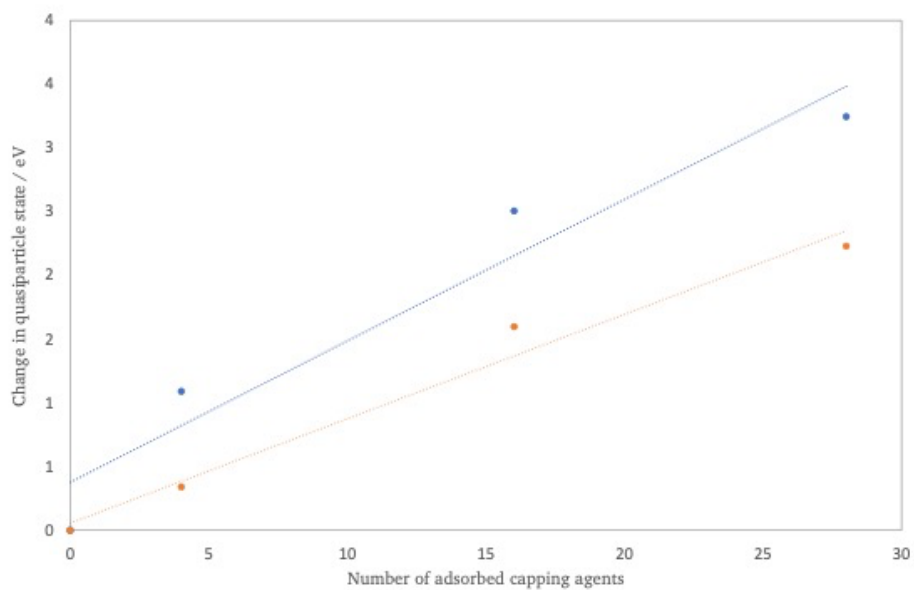

**Fig. S3** Change in the occupied (red points) and unoccupied (blue points) quasiparticle states of  $(\text{CdS})_{32}$  as function of the number of adsorbed capping agents. Red and blue dashed lines are lines of best fit.

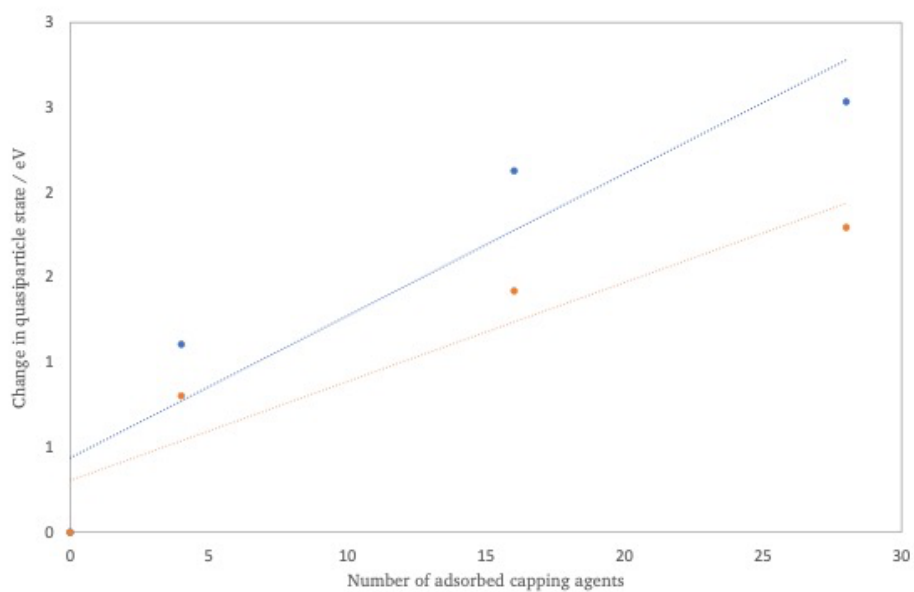

**Fig. S4** Change in the occupied (red points) and unoccupied (blue points) quasiparticle states of  $(\text{CdO})_{32}$  as function of the number of adsorbed capping agents. Red and blue dashed lines are lines of best fit.
